# Supplementary material for: Hypofractionated Whole Breast Irradiation and Boost-IOERT in Early Stage Breast Cancer (HIOB): First Clinical Results of a Prospective Multicenter Trial (NCT01343459)
Source: MDPI journal article supplement (doi:10.3390/cancers14061396), 2022-03-09
Supplement: s1 [file s1]

# Supplementary Materials: Hypofractionated Whole Breast Irradiation and Boost-IOERT in Early Stage Breast Cancer (HIOB): First Clinical Results of a Prospective Multicenter Trial (NCT01343459)

Gerd Fastner, Roland Reitsamer, Christoph Gaisberger, Wolfgang Hitzl, Bartosz Urbański Dawid Murawa, Christiane Matuschek, Wilfried Budach, Antonella Ciabattoni, Juliann Reiland, Marie Molnar, Cristiana Vidali, Claudia Schumacher, Felix Sedlmayer and on behalf of the HIOB Trialist Group

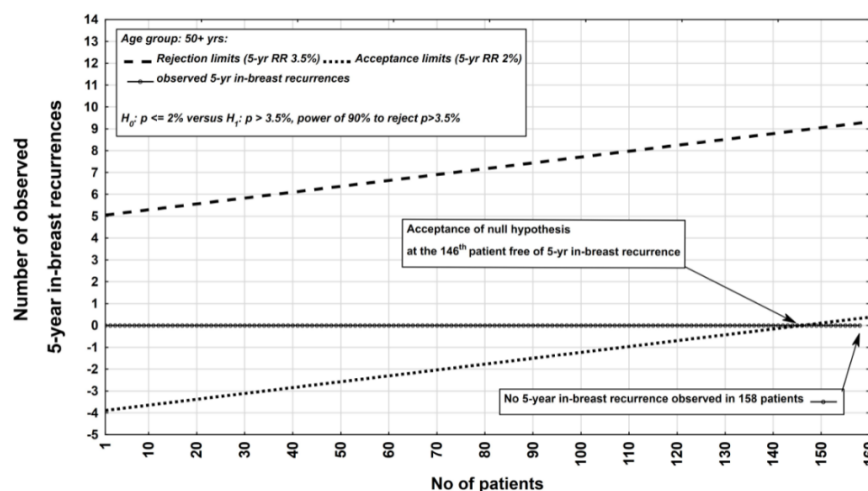

Numbers at risk

| FUP, months       | I, 1        |     | II, 4-5       |     | III, 13        |     | IV, 24           |     | V, 36            |     | VI, 48           |     | VII, 60         |     | VIII, 72        |     | IX, 79          |     | X, 92          |     | XI, 108           |     |
|-------------------|-------------|-----|---------------|-----|----------------|-----|------------------|-----|------------------|-----|------------------|-----|-----------------|-----|-----------------|-----|-----------------|-----|----------------|-----|-------------------|-----|
| Median, range     | 1 (0.2-2.8) |     | 4.6 (2.8-8.7) |     | 12.9(7.9-20.9) |     | 24.5 (18.8-32.8) |     | 36.5 (27.5-44.4) |     | 48.4 (37.5-58.3) |     | 60.3(50.4-69.4) |     | 72.3(63.8-82.7) |     | 84.3(79.4-92.2) |     | 95.8(90-101.5) |     | 102.8 (102-103.6) |     |
| analysis patients | pp          | itt | pp            | itt | pp             | itt | pp               | itt | pp               | itt | pp               | itt | pp              | itt | pp              | itt | pp              | itt | pp             | itt | pp                | itt |
| sum patients      | 657         | 123 | 650           | 122 | 636            | 120 | 597              | 108 | 559              | 100 | 462              | 75  | 339             | 53  | 225             | 34  | 59              | 16  | 16             | 9   | 0                 | 1   |
|                   | 780         |     | 772           |     | 756            |     | 705              |     | 659              |     | 537              |     | 392             |     | 259             |     | 75              |     | 25             |     | 1                 |     |

**Figure S1.** 5-year local recurrence rate: SPRT for age group > 50 years. pp: per protocol, itt: intention to treat, FUP: follow-up.

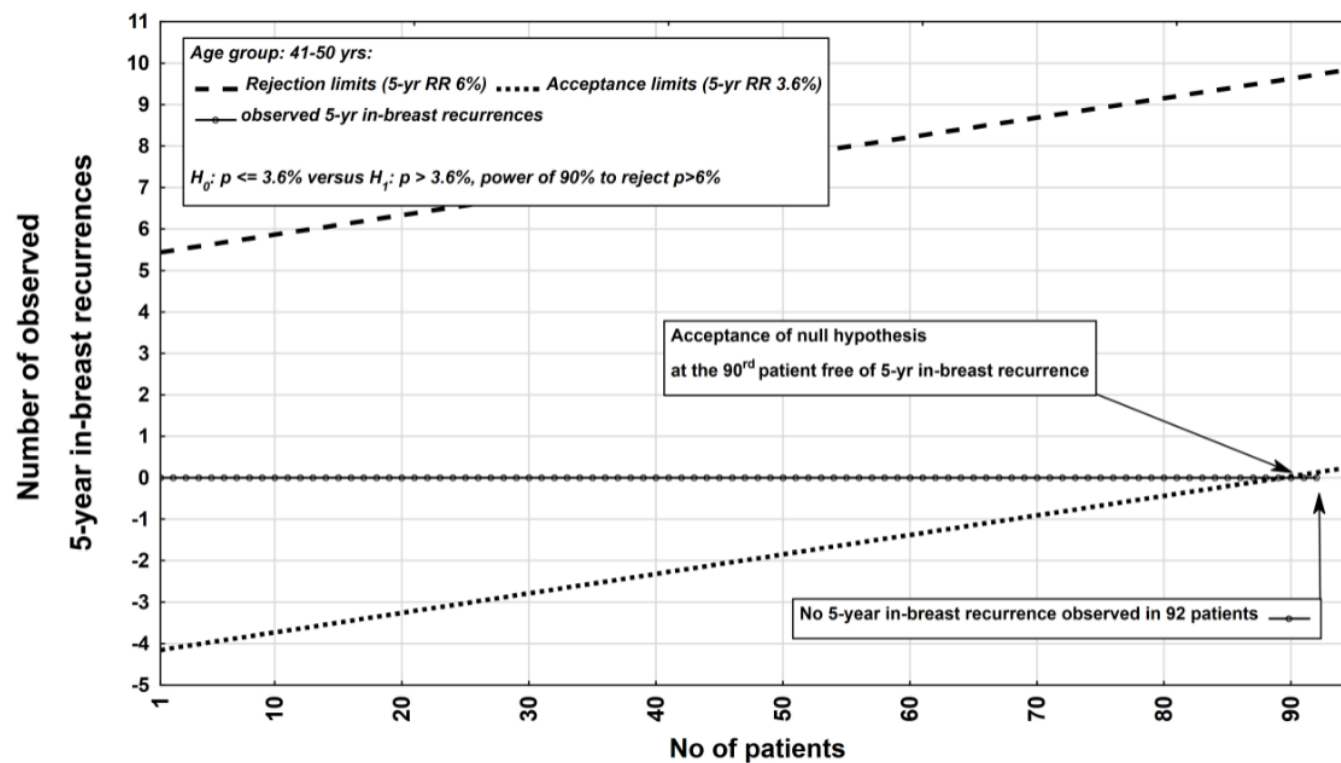

#### Numbers at risk

| FUP, months       | I, 1          |     | II, 4-5       |     | III, 13        |     | IV, 24          |     | V, 36            |     | VI, 48           |     | VII, 60          |     | VIII, 72         |     | IX, 84         |     | X, 96          |     | XI, 108 |     |
|-------------------|---------------|-----|---------------|-----|----------------|-----|-----------------|-----|------------------|-----|------------------|-----|------------------|-----|------------------|-----|----------------|-----|----------------|-----|---------|-----|
| Median, range     | 0.9 (0.3-2.7) |     | 4.6 (2.9-8.6) |     | 12.9(8.8-20.6) |     | 24.4(18.3-32.2) |     | 36.6 (29.3-45.6) |     | 48.7 (41.1-57.6) |     | 60.5 (50.9-68.8) |     | 72.4 (68.7-80.2) |     | 84 (80.8-87.5) |     | 96.2 (93-96.8) |     | 0       |     |
| analysis patients | pp            | itt | pp            | itt | pp             | itt | pp              | itt | pp               | itt | pp               | itt | pp               | itt | pp               | itt | pp             | itt | pp             | itt | pp      | itt |
|                   | 246           | 37  | 245           | 34  | 233            | 27  | 204             | 21  | 166              | 15  | 128              | 12  | 104              | 9   | 72               | 7   | 18             | 4   | 6              | 1   | 0       | 0   |
| sum patients      | 283           |     | 279           |     | 260            |     | 225             |     | 181              |     | 140              |     | 113              |     | 79               |     | 22             |     | 7              |     | 0       |     |

Figure S2. 5-year local recurrence rate: SPRT for age group 41-50 years. pp: per protocol, itt: intention to treat, FUP: follow-up.

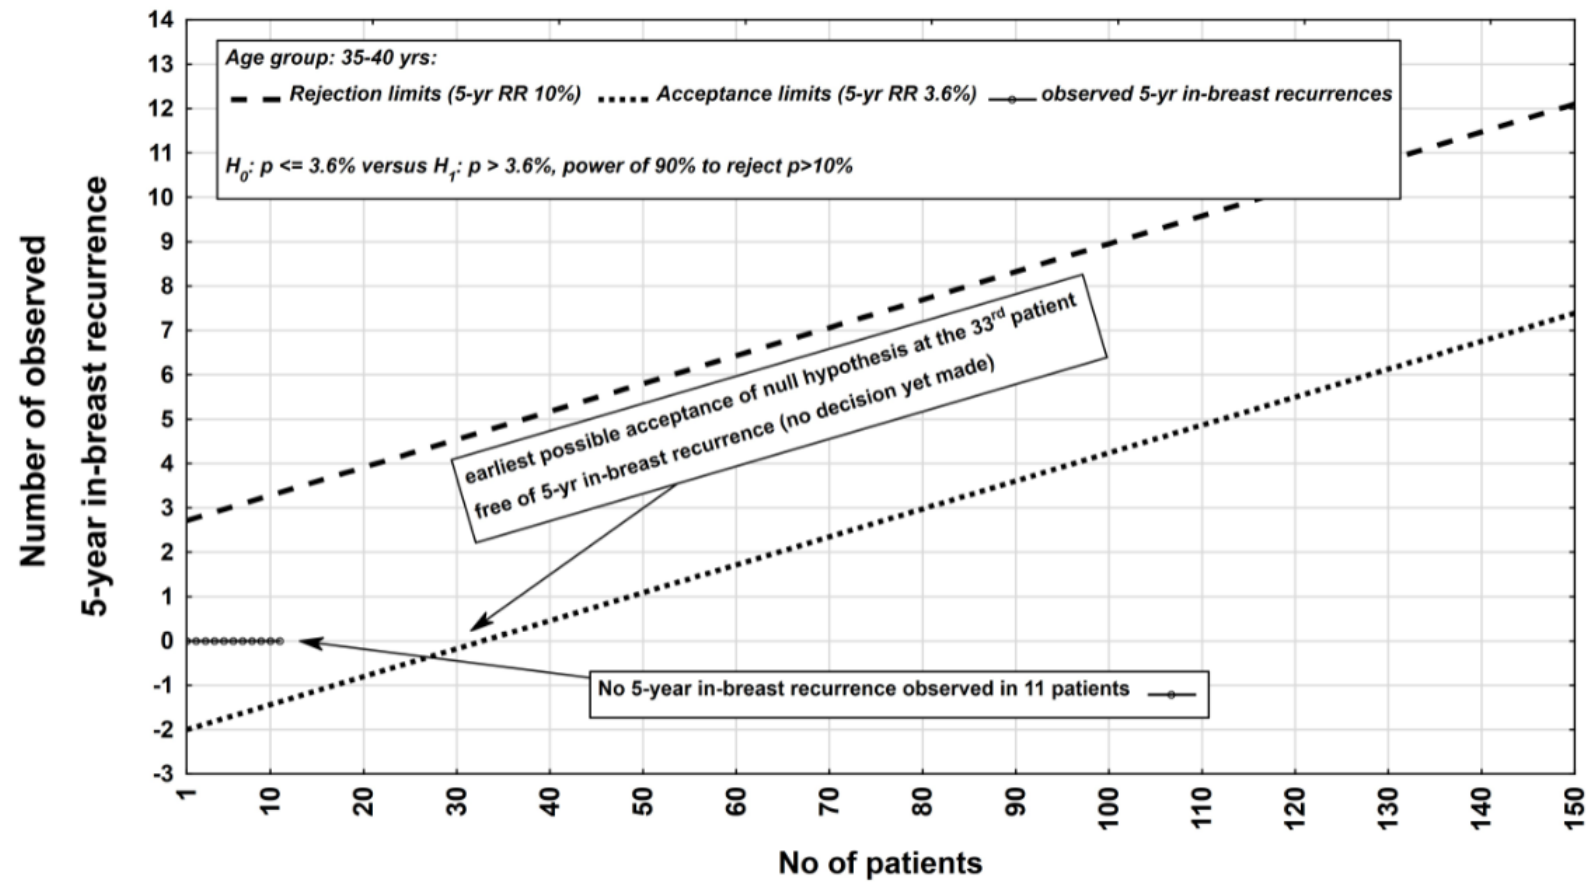

Numbers at risk

| FUP, months       | I, 1       |     | II, 4-5     |     | III, 13       |     | IV, 24         |     | V, 36          |     | VI, 48           |     | VII, 60        |     | VIII, 72       |     | IX, 84           |     | X, 96            |     | XI, 108 |     |
|-------------------|------------|-----|-------------|-----|---------------|-----|----------------|-----|----------------|-----|------------------|-----|----------------|-----|----------------|-----|------------------|-----|------------------|-----|---------|-----|
| Median, range     | 1(0.5-2.1) |     | 4.7 (3.2-8) |     | 13 (9.4-19.3) |     | 25 (19.6-31.8) |     | 36.9 (30.9-41) |     | 48.9 (42.9-50.8) |     | 60.7 (55-63.3) |     | 72.9 (67-75.6) |     | 79.5 (79.5-79.5) |     | 92.3 (92.3-92.3) |     | 0       |     |
| analysis patients | pp         | itt | pp          | itt | pp            | itt | pp             | itt | pp             | itt | pp               | itt | pp             | itt | pp             | itt | pp               | itt | pp               | itt | pp      | itt |
| sum patients      | 36         |     | 36          |     | 29            |     | 24             |     | 20             |     | 13               |     | 11             |     | 9              |     | 1                |     | 1                |     | 0       |     |
|                   | 40         |     | 40          |     | 33            |     | 28             |     | 23             |     | 15               |     | 13             |     | 10             |     | 1                |     | 1                |     | 0       |     |

**Figure S3.** 5-year local recurrence rate: SPRT for age group 35-40 years.

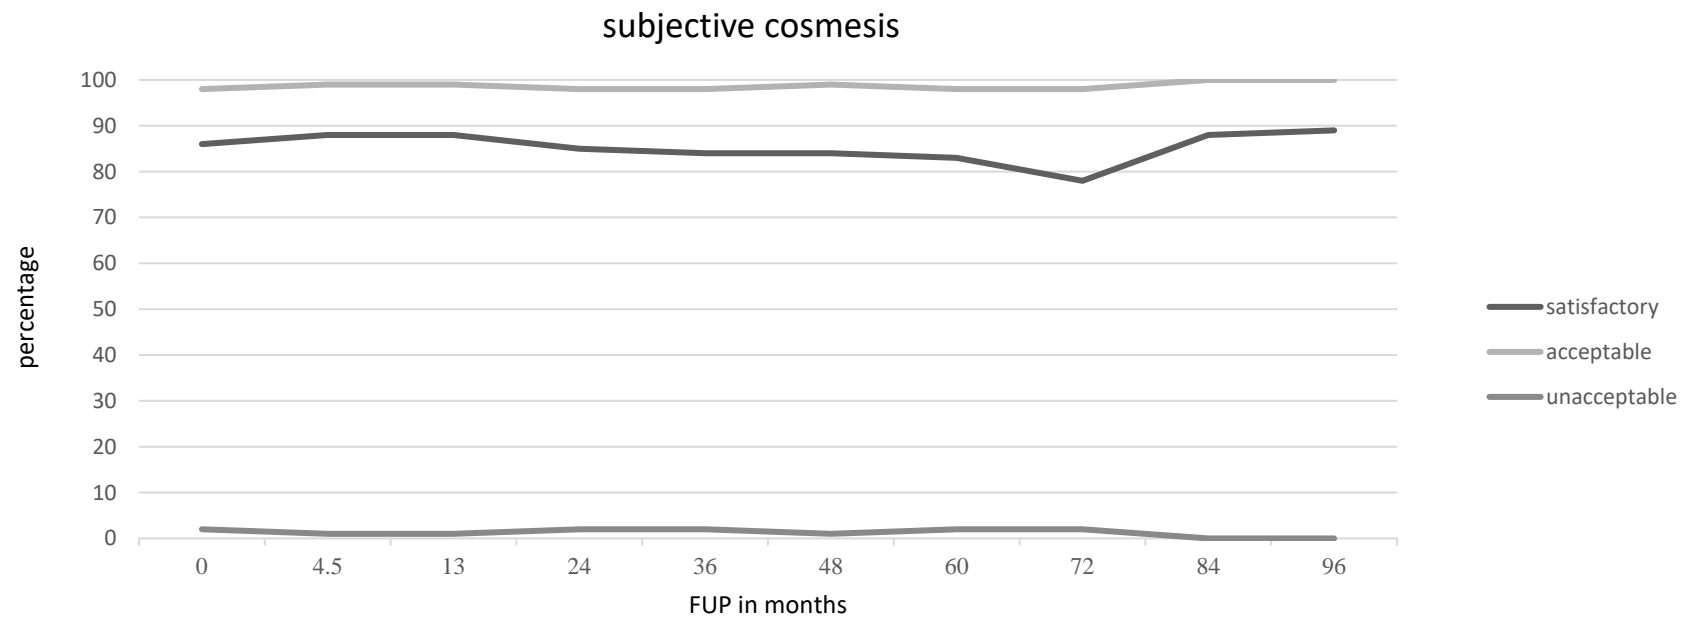

|                          |      |         |          |           |           |           |           |           |           |          |       |
|--------------------------|------|---------|----------|-----------|-----------|-----------|-----------|-----------|-----------|----------|-------|
| <b>Number at risk</b>    |      |         |          |           |           |           |           |           |           |          |       |
| <b>Median FUP months</b> | 1118 | 1091    | 1049     | 958       | 863       | 692       | 518       | 348       | 98        | 33       | 1     |
| <b>Range FUP</b>         |      | 4.6     | 12.9     | 24.5      | 36.5      | 48.5      | 60.4      | 72.3      | 84.2      | 95.9     | 103.6 |
|                          |      | 2.8-8.7 | 7.9-20.9 | 18.3-32.8 | 27.5-45.6 | 37.5-58.3 | 50.4-69.4 | 63.8-82.7 | 79.4-92.2 | 90-101.5 |       |

**Figure S4.** Subjective cosmesis over time (ratings patient-reported).

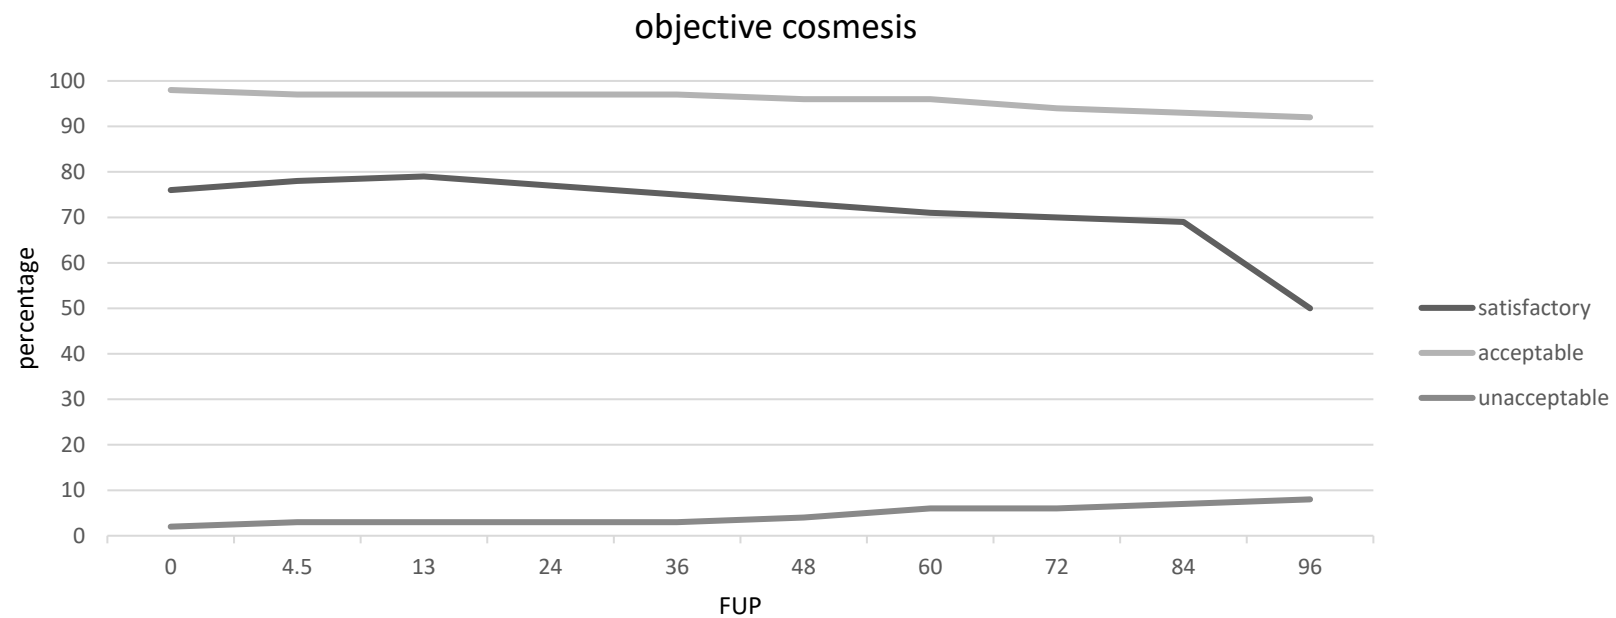

|                          |      |         |          |           |           |           |           |           |           |          |   |
|--------------------------|------|---------|----------|-----------|-----------|-----------|-----------|-----------|-----------|----------|---|
| <b>Number at risk</b>    |      |         |          |           |           |           |           |           |           |          |   |
| <b>Median FUP months</b> | 1118 | 1091    | 1049     | 958       | 863       | 692       | 518       | 348       | 98        | 33       | 1 |
| <b>Range FUP</b>         |      | 2.8-4.6 | 7.9-12.9 | 18.3-24.5 | 27.5-36.5 | 37.5-48.5 | 50.4-60.4 | 63.8-72.3 | 79.4-92.2 | 90-101.5 |   |

**Figure S5.** Objective cosmesis over time (ratings physician-reported).

**Table S1.** Exclusion criteria.

| Exclusion criteria                 |
|------------------------------------|
| negation of inclusion criteria     |
| in-situ carcinoma only             |
| secondary mastectomy               |
| previous RT to the affected breast |
| mixed connective tissue diseases   |
| chronic pre-existent lung disease  |
| cardiac co-morbidity               |
| distant metastases                 |
| observed pregnancy                 |
| bilateral breast cancer            |
| multicentricity                    |
| Karnofsky Index < 70%              |
| RNI: regional node irradiation;.   |

**Table S2.** RTOG CTC-Score version 2 and LENT SOMA scale.

| <b>Acute toxicity grade: RTOG-CTCAE Vers. 2 <sup>Ω</sup></b> |                        | <i>Clinical appearance</i>                                                                                         |
|--------------------------------------------------------------|------------------------|--------------------------------------------------------------------------------------------------------------------|
|                                                              | 0                      | None                                                                                                               |
|                                                              | 1                      | Faint erythema, dry desquamation                                                                                   |
|                                                              | 2                      | Moderate to brisk erythema, moderate edema, moist desquamation (mostly confined to skin folds and creases)         |
|                                                              | 3                      | Confluent moist desquamation > 1,5 cm and not confined to skin folds, pitting edema                                |
|                                                              | 4                      | Skin necrosis or ulceration of full thickness dermis; may include bleeding no induced by minor trauma or abrasion. |
| <b>Late toxicity grade: LENT SOMA scale <sup>Ψ</sup></b>     |                        |                                                                                                                    |
|                                                              | <i>Pain</i>            | <i>Clinical appearance</i>                                                                                         |
|                                                              | 0                      | No                                                                                                                 |
|                                                              | 1                      | Occasional - minimal Hypersensation, Pruritus                                                                      |
|                                                              | 2                      | Intermittend & tolerable                                                                                           |
|                                                              | 3                      | Persistent & intense                                                                                               |
|                                                              | 4                      | Refractory & excruciating                                                                                          |
|                                                              | <i>Breast edema</i>    | <i>Clinical appearance</i>                                                                                         |
|                                                              | 0                      | No                                                                                                                 |
|                                                              | 1                      | Asymptomatic                                                                                                       |
|                                                              | 2                      | Symptomatic                                                                                                        |
|                                                              | 3                      | Secondary dysfunction                                                                                              |
|                                                              | <i>Fibrosis</i>        | <i>Clinical appearance</i>                                                                                         |
|                                                              | 0                      | No                                                                                                                 |
|                                                              | 1                      | Barely palpable increased Density                                                                                  |
|                                                              | 2                      | Definite increased density and firmness                                                                            |
|                                                              | 3                      | Very marked density, retraction and fixation                                                                       |
|                                                              | <i>Teleangiectasia</i> | <i>Clinical appearance</i>                                                                                         |
|                                                              | 0                      | No                                                                                                                 |
|                                                              | 1                      | <1/cm2                                                                                                             |
|                                                              | 2                      | 1/cm2 - 4/cm2                                                                                                      |
|                                                              | 3                      | >4/cm2                                                                                                             |
|                                                              | <i>Arm lymphedema</i>  | <i>Clinical appearance</i>                                                                                         |
|                                                              | 0                      | No                                                                                                                 |

|                           |                            |
|---------------------------|----------------------------|
| 1                         | 2 cm - 4 cm increase       |
| 2                         | >4 cm - 6 cm increase      |
| 3                         | >6 cm increase             |
| 4                         | 2 cm - 4 cm increase       |
| <i>Retraction/atrophy</i> | <i>Clinical appearance</i> |
| 0                         | No                         |
| 1                         | 10%-25%                    |
| 2                         | 25% - 40%                  |
| 3                         | 40% - 75%                  |
| 4                         | Whole breast               |
| Ulcers                    | <i>Clinical appearance</i> |
| 0                         | No                         |
| 1                         | epidermal only,< 1 cm      |
| 2                         | Demal,> 1 cm <sup>2</sup>  |
| 3                         | Subcutaneous               |
| 4                         | Bone exposed,necrosis      |

$\Omega$ : reference [29]  $\Psi$ : reference [30,31].



**Table S3.** Cosmesis Score <sup>Φ</sup>.

| <i>Single classification</i>  | <i>Cosmetic result</i> | <i>Clinical appearance</i>                                                 |
|-------------------------------|------------------------|----------------------------------------------------------------------------|
| E0                            | excellent              | no visible therapy related sequelae                                        |
| E1                            | good                   | minimal changes in pigmentation, visible scars, localized teleangiectasia  |
| E2                            | moderate               | clear deformation breast contour, nipple displacement, marked skin changes |
| E3                            | bad                    | Severe retraction or fibrosis, severe teleangiectasia                      |
| E4                            | complication           | Skin necrosis                                                              |
| <i>Summary classification</i> | <i>Cosmetic result</i> |                                                                            |
| E0, E1                        | satisfactory           |                                                                            |
| E2                            | moderate               |                                                                            |
| E0,E1,E2                      | acceptable             |                                                                            |
| E3,E4                         | unacceptable           |                                                                            |

Φ: reference [32].

**Table S4.** Technical parameters.

| <b>Technical parameters</b>     |                 |
|---------------------------------|-----------------|
| <i>IOERT</i> median (range)     |                 |
| Tubediameter (cm)               | 6 (4-8)         |
| Electron energy (MeV)           | 9 (4-15)        |
| Mixed electron energy n (%)     | 128 (11)        |
| Bevel angle (degree)            | 22 (0-45)       |
| V90 (ml)                        | 44 (4-104)      |
| <i>Depth calculation: n (%)</i> |                 |
| CT                              | 2 (0.2)         |
| Probe/needle                    | 331 (30)        |
| ultrasound                      | 774 (68.8)      |
| ns                              | 12 (1)          |
| <i>Lead-shielding: n (%)</i>    |                 |
| no                              | 268 (24)        |
| yes                             | 851 (76)        |
| <b>HWBI</b>                     |                 |
| Breast volume (PTV: ml)         | 1350 (233-2457) |
| ns (n)                          | 4               |

MeV: Mega electron Voltage, V90: tissue volume encompassed by the IOERT 90% Isodose (10Gy), ns: not stated, PTV: Planning target volume, ns: not stated.

**Table S5.** Overview of the clinical status.

| <b>Status</b>               | <b>n (%)</b> |
|-----------------------------|--------------|
| <i>DM</i>                   | 23 (2)       |
| breast cancer               | 17 (1.5)     |
| secondary cancers           | 6 (0.5)      |
| <i>Deaths</i>               | 25 (2)       |
| breast cancer               | 6 (0.5)      |
| secondary cancers           | 8 (0.5)      |
| other reasons               | 11 (1)       |
| <i>IBR</i>                  | 2 (0.2)      |
| <i>RR</i>                   | 1 (0.1)      |
| <i>Secondary cancer</i>     | 49 (4)       |
| Contralateral breast cancer | 17 (1.5)     |
| Others                      | 32 (3)       |

DM: distant metastases, IBR: in-breast recurrences, RR: regional recurrence

**Table S6.** Perioperative major complications (PMJ), LENTSOMA G4 pain, second surgery for cosmetic reasons.

| <b>PMJ</b>                                     | <b>patients (n)</b>                                               |
|------------------------------------------------|-------------------------------------------------------------------|
| hemorrhage                                     | 15                                                                |
| prolonged wound healing/disorders              | 18                                                                |
| seroma                                         | 10                                                                |
| wound infection/inflammation                   | 7                                                                 |
| no comments                                    | 15                                                                |
| <b>patient LENTSOMA G4 pain / point of FUP</b> | <b>comments</b>                                                   |
| patient 1 / months 4/5                         | accompanied with G3 fibrosis/shrinkage / declined any further FUP |
| patient 2 / year 3                             | developed metastases in year 2 / died in year 3 due to disease    |
| patient 3 / months 4/5, year 1                 | G4 rating resolved in year 2 / lost to FUP thereafter             |
| <b>second surgery for cosmetic reasons</b>     | <b>patients (n)</b>                                               |
| lipofilling                                    | 6                                                                 |
| excision of liponecrosis                       | 1                                                                 |
| breast augmentation                            | 1                                                                 |
| breast reconstruction                          | 2                                                                 |
| reduction mastopexy                            | 1                                                                 |

FUP: follow up.

**Table S7.** Cosmesis evaluation

| Score | pre-WBI       |              | FUP 4-5 months |              | FUP 12 months |              | FUP 24 months |              | FUP 36 months |              | FUP 48 months |              | FUP 60 months |              | FUP 72 months |              |
|-------|---------------|--------------|----------------|--------------|---------------|--------------|---------------|--------------|---------------|--------------|---------------|--------------|---------------|--------------|---------------|--------------|
|       | subj<br>n (%) | obj<br>n (%) | subj<br>n (%)  | obj<br>n (%) | subj<br>n (%) | obj<br>n (%) | subj<br>n (%) | obj<br>n (%) | subj<br>n (%) | obj<br>n (%) | subj<br>n (%) | obj<br>n (%) | subj<br>n (%) | obj<br>n (%) | subj<br>n (%) | obj<br>n (%) |
| E0    | 278(26)       | 160(17)      | 383(38)        | 240(26)      | 391(40)       | 264(29)      | 347(39)       | 240(29)      | 303(37)       | 220(29)      | 211(32)       | 178(30)      | 138(28)       | 125(28)      | 88(27)        | 81(26)       |
| E1    | 631(60)       | 548(59)      | 513(50)        | 484(52)      | 469(48)       | 447(50)      | 412(46)       | 389(48)      | 378(47)       | 343(46)      | 333(52)       | 257(43)      | 269(55)       | 192(43)      | 171(51)       | 135(44)      |
| E2    | 125(12)       | 207(22)      | 111(11)        | 174(19)      | 107(11)       | 163(18)      | 116(13)       | 162(20)      | 115(14)       | 160(22)      | 100(15)       | 137(23)      | 75(15)        | 101(23)      | 67(20)        | 72(24)       |
| E3    | 14(2)         | 22(2)        | 12(1)          | 23(3)        | 12(0.9)       | 24(3)        | 10(2)         | 21(3)        | 10(2)         | 21(3)        | 6(1)          | 20(4)        | 8(2)          | 24(6)        | 6(2)          | 18(6)        |
| E4    |               |              |                |              | 1(0.1)        |              |               |              |               |              |               |              |               |              |               |              |
| eP    | 1048          | 937          | 1019           | 921          | 980           | 898          | 885           | 812          | 806           | 744          | 650           | 592          | 490           | 442          | 332           | 306          |
| ns    | 70 (6)        | 181 (16 )    | 72 (6 )        | 170 (15)     | 69 (6 )       | 151 (14)     | 73 (7)        | 146 (15)     | 57 (7)        | 119 (14)     | 42 (6)        | 100 (14)     | 28 (5)        | 76 (15)      | 16 (4)        | 42 (12)      |

| Number at risk     | 1118 | 1091          | 1049            | 958              | 863              | 692              | 518              | 348              |
|--------------------|------|---------------|-----------------|------------------|------------------|------------------|------------------|------------------|
| Median FUP (range) |      | 4.6 (2.8-8.7) | 12.9 (7.9-20.9) | 24.5 (18.3-32.8) | 36.5 (27.5-45.6) | 48.5 (37.5-58.3) | 60.4 (50.4-69.4) | 72.3 (63.8-82.7) |

| Score | FUP 84 months |              | FUP 96 months |              | FUP 108 months |              |
|-------|---------------|--------------|---------------|--------------|----------------|--------------|
|       | subj<br>n (%) | obj<br>n (%) | subj<br>n (%) | obj<br>n (%) | subj<br>n (%)  | obj<br>n (%) |
| E0    | 27(29)        | 18(20)       | 8(28)         | 5(21)        |                |              |
| E1    | 55(59)        | 44(49)       | 17(61)        | 7(29)        |                |              |
| E2    | 11(12)        | 21(24)       | 3(11)         | 10(42)       | 1(100)         | 1(100)       |
| E3    |               | 6(7)         |               | 2(8)         |                |              |
| E4    |               |              |               |              |                |              |
| eP    | 93            | 89           | 28            | 24           | 1              | 1            |
| ns    | 5 ( 2)        | 9 (9)        | 5 (15)        | 9 (27)       | 0              | 0            |

  

| Number at risk     | 98               | 33              | 1     |
|--------------------|------------------|-----------------|-------|
| Median FUP (range) | 84.2 (79.4-92.2) | 95.9 (90-101.5) | 103.6 |

eP: evaluated patients; ns: not stated; subj: subjective (i.e patient-reported); obj: objective (i.e physician-reported)
